# Supplementary material
Source: ML conference proceedings conference paper supplement (https://proceedings.mlr.press/v70/masegosa17a.html)
Supplement: Supplementary file 1 [file masegosa17a-supp.pdf]

---

# Supplementary Material for Bayesian models of Data Streams with HPPs

---

Andrés Masegosa<sup>1,2</sup> Thomas D. Nielsen<sup>3</sup> Helge Langseth<sup>2</sup> Darío Ramos-López<sup>1</sup> Antonio Salmerón<sup>1</sup>  
Anders L. Madsen<sup>3,4</sup>

## A. Proof of Theorem 1 and Lemma 2

*Proof of Theorem 1.* In the specification of  $\mathcal{L}$  we have that  $\mathbb{E}_q[\ln \hat{p}(\boldsymbol{\beta}_t | \boldsymbol{\lambda}_{t-1}, \rho_t)]$  (defined in Equation (7)) can be expanded as (ignoring the base measure) :

$$\mathbb{E}_q[(\rho_t \boldsymbol{\lambda}_{t-1} + (1 - \rho_t) \boldsymbol{\alpha}_u) \mathbf{t}(\boldsymbol{\beta}_t) - a_g(\rho_t \boldsymbol{\lambda}_{t-1} + (1 - \rho_t) \boldsymbol{\alpha}_u)].$$

Since  $a_g$  is convex we have

$$a_g(\rho_t \boldsymbol{\lambda}_{t-1} + (1 - \rho_t) \boldsymbol{\alpha}_u) \leq \rho_t a_g(\boldsymbol{\lambda}_{t-1}) + (1 - \rho_t) a_g(\boldsymbol{\alpha}_u),$$

which combined with Equation (10) gives

$$\begin{aligned} & \mathbb{E}_q[\ln p(\mathbf{x}_t, \mathbf{Z}_t | \boldsymbol{\beta}_t)] + \mathbb{E}_q[(\rho_t \boldsymbol{\lambda}_{t-1} + (1 - \rho_t) \boldsymbol{\alpha}_u) \mathbf{t}(\boldsymbol{\beta}_t) \\ & - \rho_t a_g(\boldsymbol{\lambda}_{t-1}) - (1 - \rho_t) a_g(\boldsymbol{\alpha}_u)] + \mathbb{E}_q[p(\rho_t | \gamma)] \\ & - \mathbb{E}_q[\ln q(\mathbf{Z}_t | \boldsymbol{\phi}_t)] - \mathbb{E}_q[q(\boldsymbol{\beta}_t | \boldsymbol{\lambda}_t)] - \mathbb{E}_q[q(\rho_t | \omega_t)] \leq \mathcal{L}. \end{aligned}$$

Lastly, by exploiting the mean field factorization of  $q$  and using the exponential family form of  $p_\delta(\boldsymbol{\beta}_t | \boldsymbol{\lambda}_{t-1})$  and  $p_u(\boldsymbol{\beta}_t)$  we get the desired result.  $\square$

*Proof of Lemma 2.* Firstly, by ignoring the terms in  $\hat{\mathcal{L}}$  (Equation (11)) that do not involve  $\omega_t$  we get

$$\begin{aligned} \hat{\mathcal{L}}(\omega_t) &= \mathbb{E}_q[\rho_t] (\mathbb{E}_q[\ln(p_\delta(\boldsymbol{\beta}_t | \boldsymbol{\lambda}_{t-1}))] - \mathbb{E}_q[\ln p_u(\boldsymbol{\beta}_t)]) \\ &+ \mathbb{E}_q[p(\rho_t | \gamma)] - \mathbb{E}_q[q(\rho_t | \omega_t)]. \end{aligned}$$

Assuming that the sufficient statistics function  $\mathbf{t}(\rho_t)$  for  $p(\rho_t | \gamma)$  and  $q(\boldsymbol{\beta}_t | \boldsymbol{\lambda}_t)$  is the identity function ( $\mathbf{t}(\rho_t) = \rho_t$ ) we have

$$\begin{aligned} \hat{\mathcal{L}}(\omega_t) &= \mathbb{E}_q[\rho_t] (\mathbb{E}_q[\ln(p_\delta(\boldsymbol{\beta}_t | \boldsymbol{\lambda}_{t-1}))] - \mathbb{E}_q[\ln p_u(\boldsymbol{\beta}_t)]) \\ &+ \gamma \mathbb{E}_q[\rho_t] - (\omega_t \mathbb{E}_q[\rho_t] - a_g(\omega_t)) + cte. \end{aligned}$$

Using  $\mathbb{E}_q[\mathbf{t}(\rho_t)] = \mathbb{E}_q[\rho_t] = \nabla_{\omega_t} a_g(\omega_t)$  we get

$$\begin{aligned} \hat{\mathcal{L}}(\omega_t) &= \nabla_{\omega_t} a_g(\omega_t) (\mathbb{E}_q[\ln(p_\delta(\boldsymbol{\beta}_t | \boldsymbol{\lambda}_{t-1}))] - \mathbb{E}_q[\ln p_u(\boldsymbol{\beta}_t)]) \\ &+ \gamma \nabla_{\omega_t} a_g(\omega_t) - (\omega_t \nabla_{\omega_t} a_g(\omega_t) - a_g(\omega_t)). \end{aligned}$$

---

<sup>1</sup>Department of Mathematics, University of Almería, Almería, Spain <sup>2</sup>Department of Computer and Information Science, Norwegian University of Science and Technology, Trondheim, Norway <sup>3</sup>Department of Computer Science, Aalborg University, Aalborg, Denmark <sup>4</sup>Hugin Expert A/S, Aalborg, Denmark. Correspondence to: Andrés Masegosa <andresmasegosa@ual.es>.

and thereby

$$\nabla_{\omega_t} \hat{\mathcal{L}} = \nabla_{\omega_t}^2 a_g(\omega_t) (\mathbb{E}_q[\ln(p_\delta(\boldsymbol{\beta}_t | \boldsymbol{\lambda}_{t-1}))] - \ln p_u(\boldsymbol{\beta}_t)) + \gamma - \omega_t.$$

We can now find the natural gradient by premultiplying  $\nabla_{\omega_t} \hat{\mathcal{L}}$  by the inverse of the Fisher information matrix, which for the exponential family corresponds to the inverse of the Hessian of the log-normalizer:

$$\begin{aligned} \hat{\nabla}_{\omega_t} \hat{\mathcal{L}} &= (\nabla_{\omega_t}^2 a_g(\omega_t))^{-1} \nabla_{\omega_t} \hat{\mathcal{L}} \\ &= \mathbb{E}_q[\ln(p_\delta(\boldsymbol{\beta}_t | \boldsymbol{\lambda}_{t-1}))] - \ln p_u(\boldsymbol{\beta}_t) + \gamma - \omega_t. \end{aligned}$$

Lastly, by introducing  $q(\boldsymbol{\beta}_t | \boldsymbol{\lambda}_t) - q(\boldsymbol{\beta}_t | \boldsymbol{\lambda}_t)$  inside the expectation we get the difference in Kullback-Leibler divergence  $KL(q(\boldsymbol{\beta}_t | \boldsymbol{\lambda}_t), p_u(\boldsymbol{\beta}_t)) - KL(q(\boldsymbol{\beta}_t | \boldsymbol{\lambda}_t), p_\delta(\boldsymbol{\beta}_t | \boldsymbol{\lambda}_{t-1}))$ .  $\square$

## B. Experimental Evaluation

### B.1. Probabilistic Models

We provide a (simplified) graphical description of the probabilistic models used in the experiments. We also detail the distributional assumptions of the parameters, which are then used to define the variational approximation family.

#### ELECTRICITY MODEL

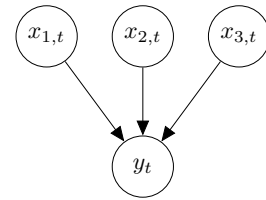

$$(\mu_i, \gamma_i) \sim \text{NormalGamma}(1, 1, 0, 1e - 10)$$

$$\gamma \sim \text{Gamma}(1, 1)$$

$$b_i \sim \mathcal{N}(0, +\infty)$$

$$x_{i,t} \sim \mathcal{N}(\mu_i, \gamma_i)$$

$$y_t \sim \mathcal{N}\left(b_0 + \sum_i b_i x_{i,t}, \gamma\right)$$

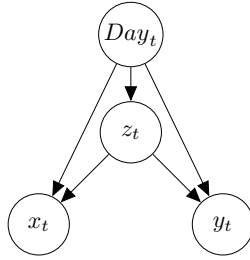

GPS MODEL

$$p \sim \text{Dirichlet}(1, \dots, 1)$$

$$p_k \sim \text{Dirichlet}(1, \dots, 1)$$

$$(\mu_{j,k}^{(x)}, \gamma_{j,k}^{(x)}) \sim \text{NormalGamma}(1, 1, 0, 1e - 10)$$

$$(\mu_{j,k}^{(y)}, \gamma_{j,k}^{(y)}) \sim \text{NormalGamma}(1, 1, 0, 1e - 10)$$

$$\text{Day}_t \sim \text{Multinomial}(p)$$

$$(z_t | \text{Day}_t = k) \sim \text{Multinomial}(p_k)$$

$$(x_t | z_t = j, \text{Day}_t = k) \sim \mathcal{N}(\mu_{j,k}^{(x)}, \gamma_{j,k}^{(x)})$$

$$(y_t | z_t = j, \text{Day}_t = k) \sim \mathcal{N}(\mu_{j,k}^{(y)}, \gamma_{j,k}^{(y)})$$

FINANCIAL MODEL

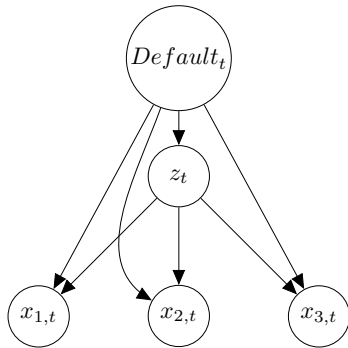

Figure 1. Simplified DAG for the financial model

$$p \sim \text{Dirichlet}(1, \dots, 1)$$

$$p_k \sim \text{Dirichlet}(1, \dots, 1)$$

$$(\mu_{i;j,k}, \gamma_{i;j,k}) \sim \text{NormalGamma}(1, 1, 0, 1e - 10)$$

$$\text{Default}_t \sim \text{Binomial}(p)$$

$$(z_t | \text{Default}_t = k) \sim \text{Multinomial}(p_k)$$

$$(x_{i,t} | z_t = j, \text{Day}_t = k) \sim \mathcal{N}(\mu_{i;j,k}, \gamma_{i;j,k})$$

## B.2. Real Life Data Sets

In the experimental section of the original paper, we plot the relative values for the  $TMLL_t$  measure with respect to

the SVB method. Here, we provides the plots of the absolute values of the  $TMLL_t$  series for the different methods studied in the paper.

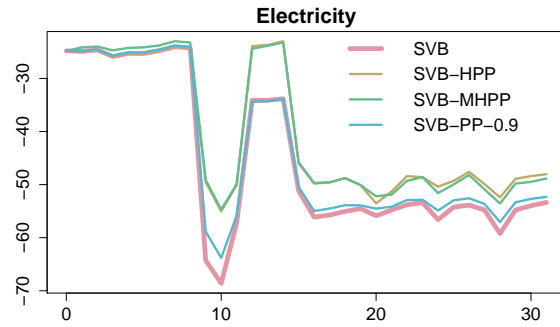

Figure 2. Electricity

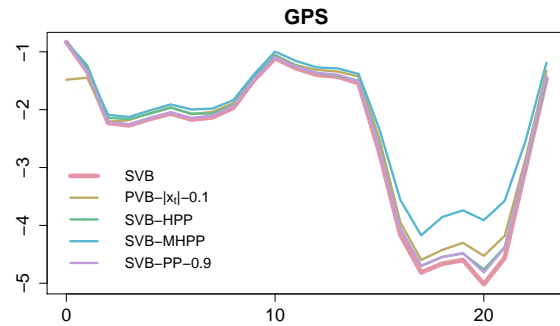

Figure 3. GPS

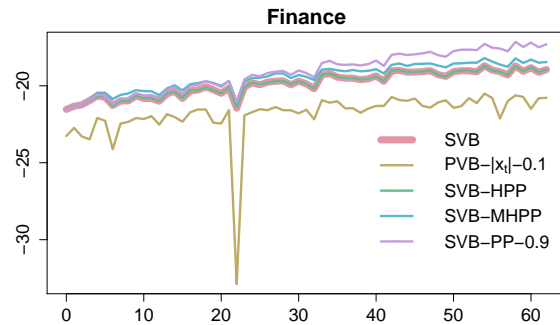

Figure 4. Finance
